# Supplementary material for: Drivers of Last Millennium Antarctic Climate Evolution in an Ensemble of Community Earth System Model Simulations
Source: MDPI journal article supplement (doi:10.3390/geosciences12080299), 2022-07-31
Supplement: s1 [file s1]

## **Supplementary Materials for**

# **Drivers of last millennium Antarctic climate evolution in an ensemble of Community Earth System Model simulations**

**Olivia J. Truax\* , Bette L. Otto-Bliesner<sup>3</sup>, Esther C. Brady, Craig L. Stevens,  
Gary S. Wilson, Christina R. Riesselman**

\*Correspondence: [oliviajtruax@gmail.com](mailto:oliviajtruax@gmail.com)

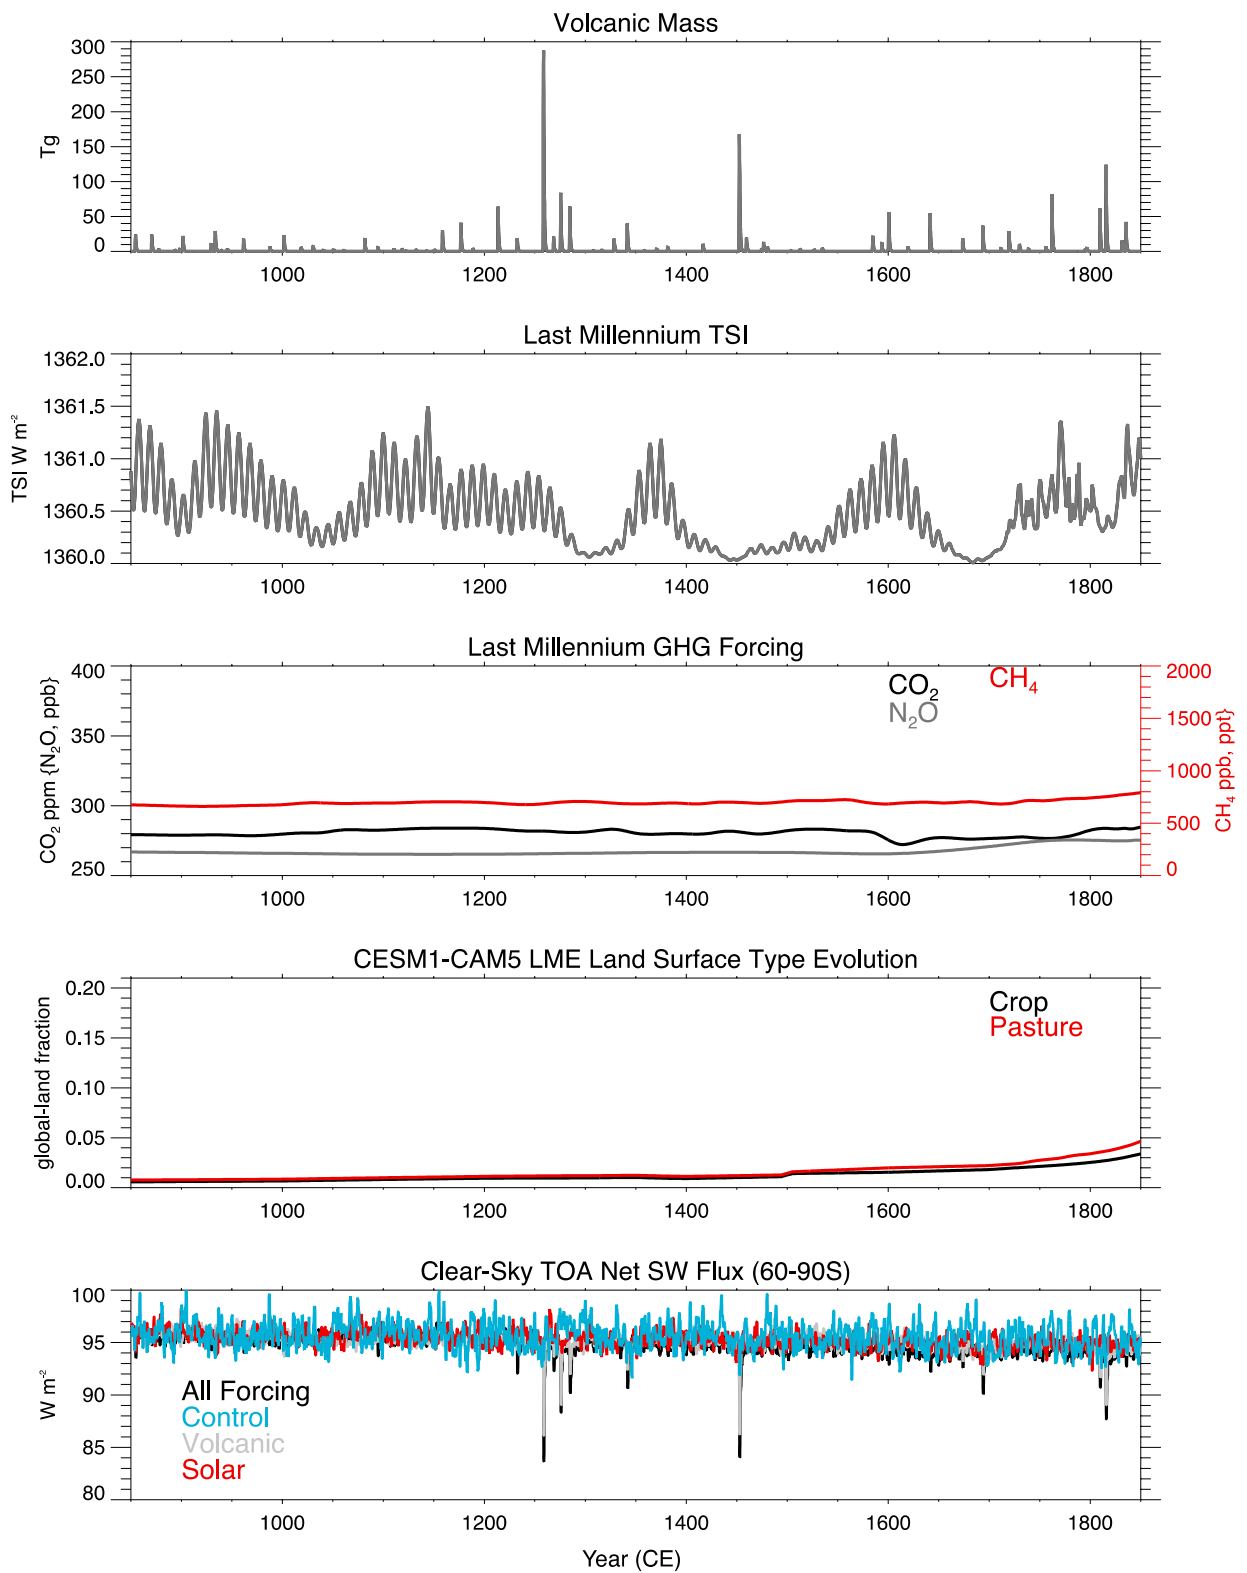

**Figure S1.** Evolution of the major forcings used for the CESM-LME including (from top to bottom): volcanic mass, TSI, GHG concentrations, crop and pasture extent, and top of atmosphere net clear-sky shortwave flux over the Antarctic (60-90°S).

Full forcing ensemble (n=13)

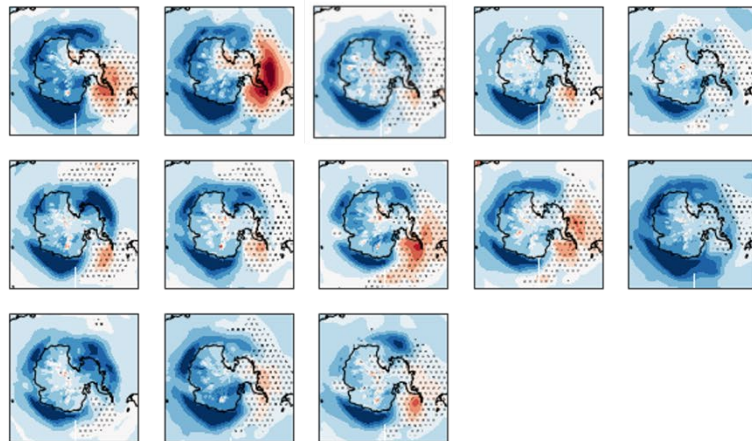

Volcanic forcing ensemble (n=5)

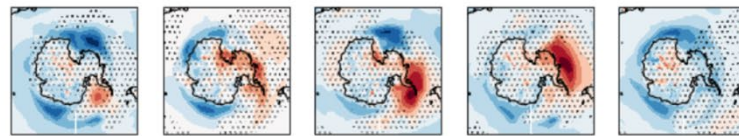

Orbital forcing ensemble (n=3)

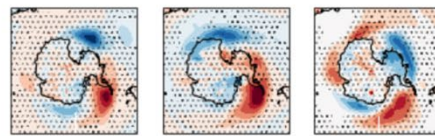

Solar forcing ensemble (n=4)

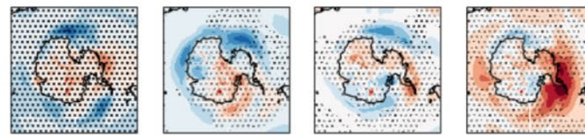

LULC forcing ensemble (n=3)

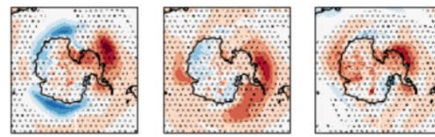

GHG forcing ensemble (n=3)

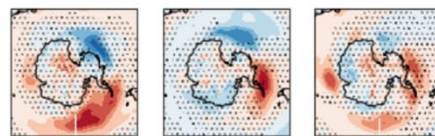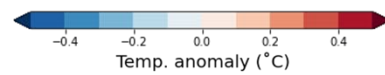

**Figure S2.** LIA (1600-1850) – MCA (850-1200) temperature anomaly in LME full and single forcing simulations. Stippling indicates differences that are not statistically significant at the 95% level using a Students *t*-test.

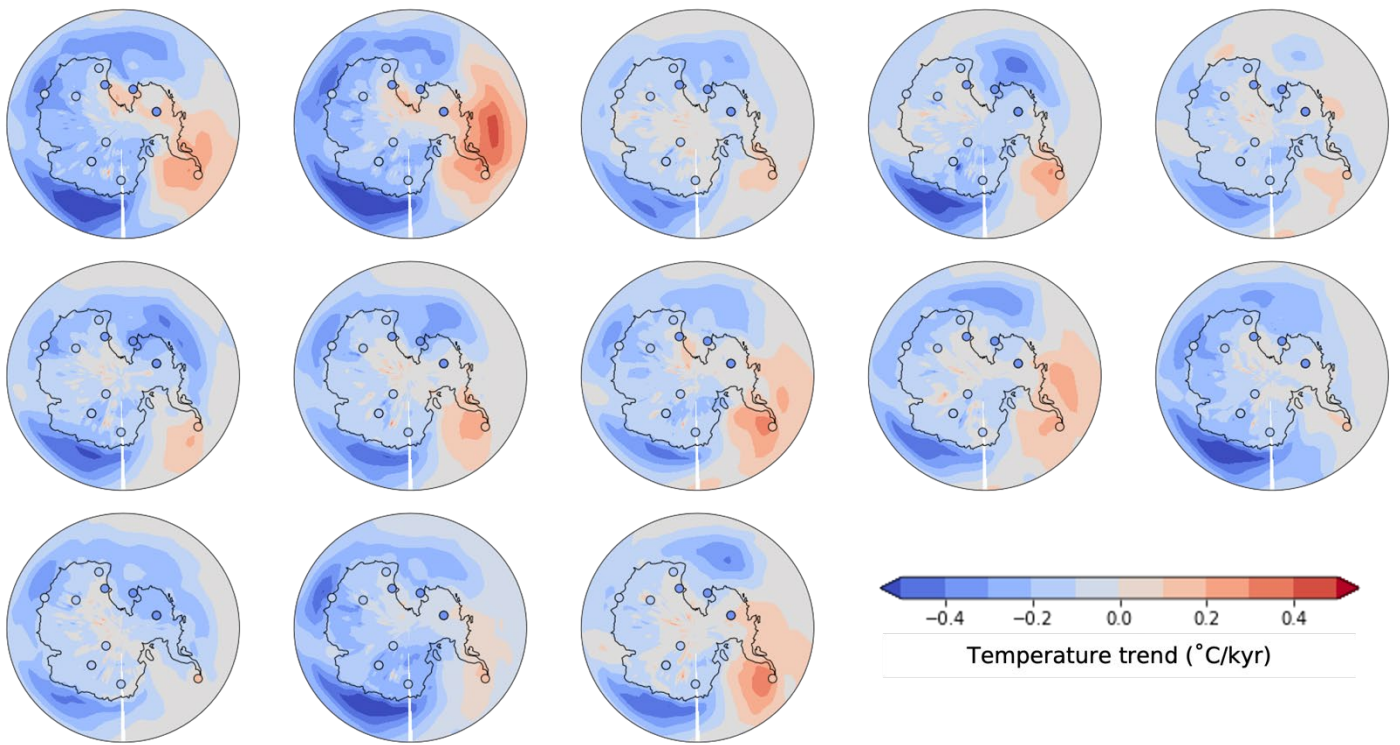

**Figure S3.** Temperature trend (°C/kyr years) for all LME full forcing ensemble members compared to ice core records. The location of records spanning the full LM (850-1850CE) shown on the map; ice core reconstructions are regional composites of all records included in the Stenni et al. [23] data-based. The locations of all records included in the composite are shown in Figure 1.

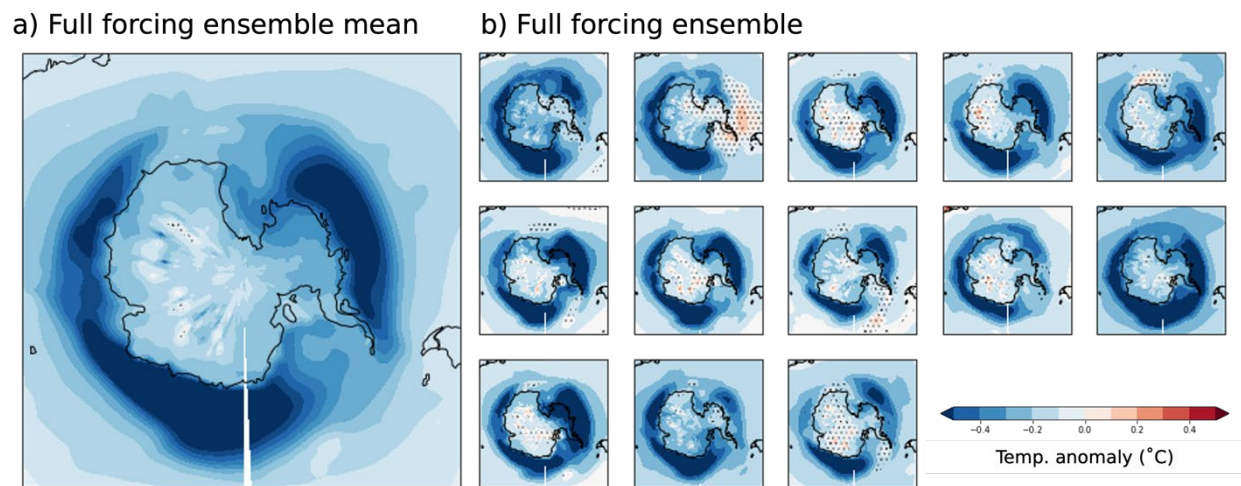

**Figure S4.** LIA (1600-1850) – MCA (850-1200) temperature anomaly in LME full forcing ensemble mean (a) and individual ensemble members (b) that were not detrended using the control simulation. Stippling indicates differences that are not statistically significant at the 95% level using a Student's *t* test.



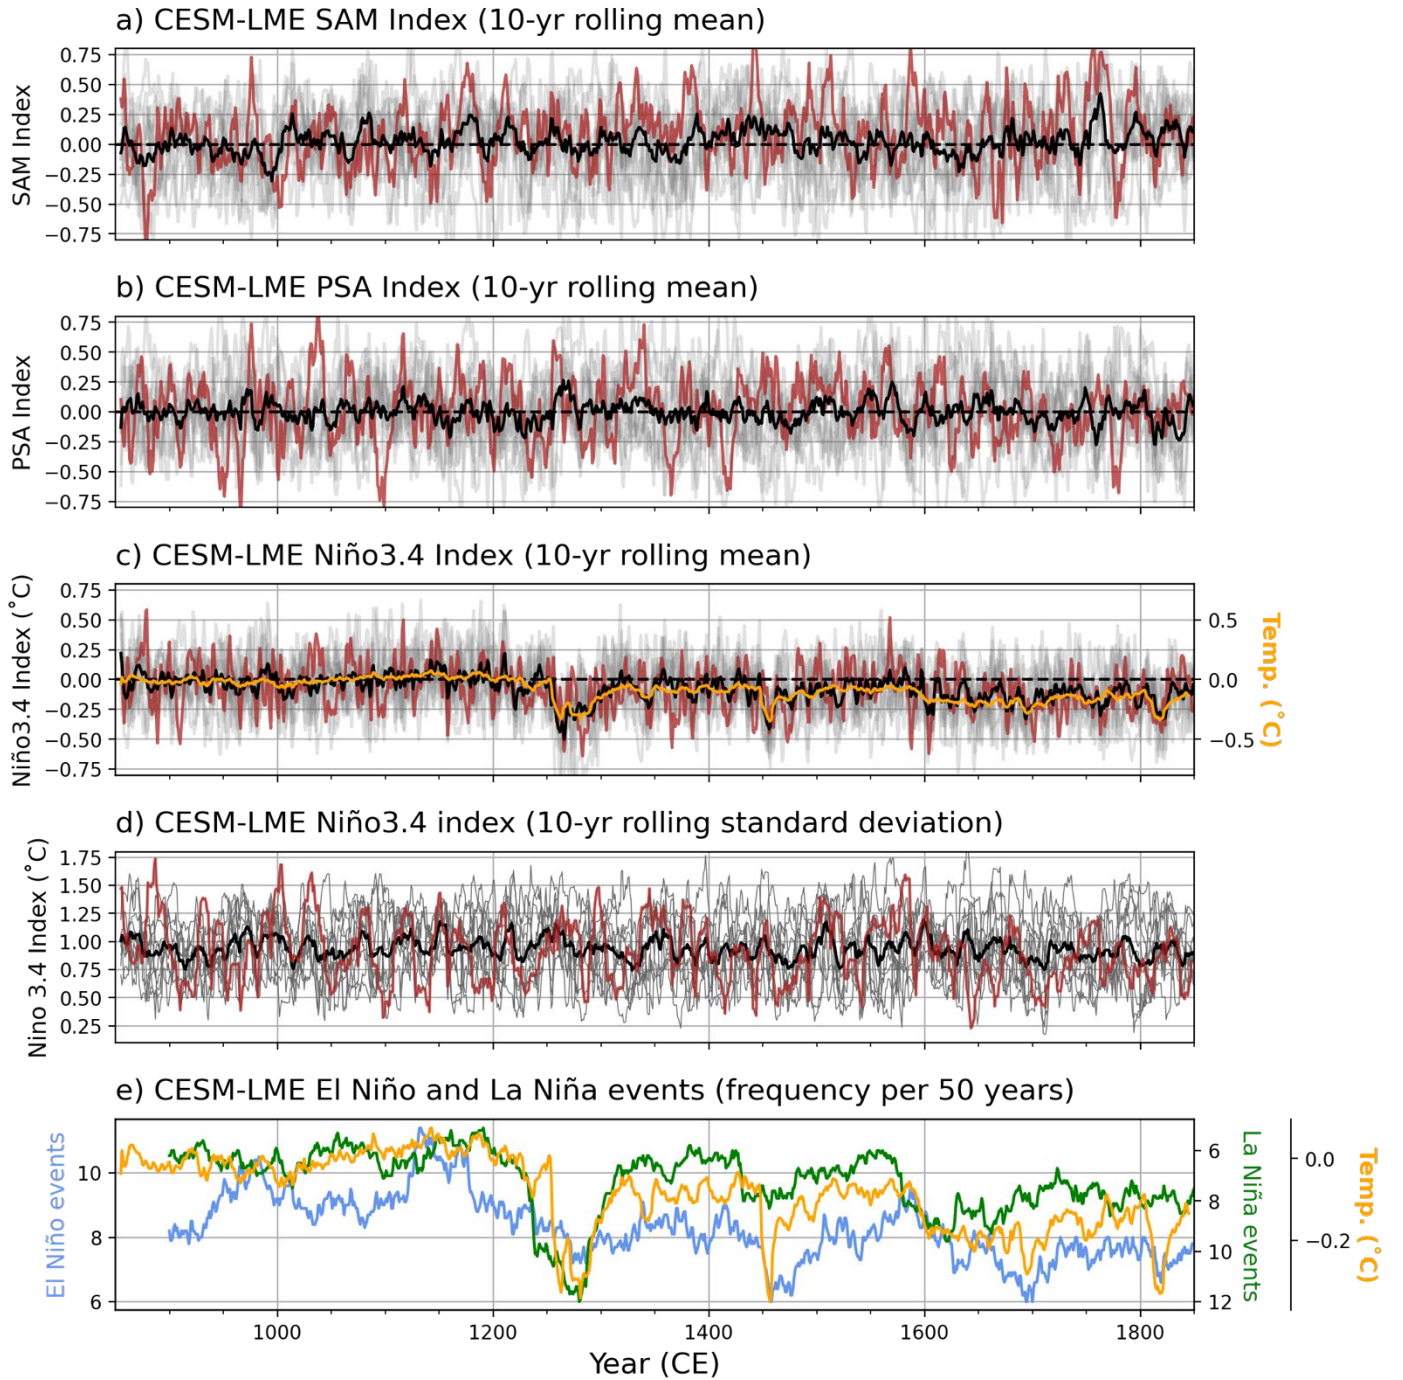

**Figure S5.** Simulated low frequency (multi-decadal) anomalies from the 850 to 1200 CE mean in modes of large-scale Southern Hemisphere climate variability in the LME. Ensemble mean shown in black, ensemble member 3 is highlighted in red to illustrate modeled SAM variability in individual ensemble members (shown collectively in grey). Orange line on c) and e) shows the global equatorial temperature anomaly (5°S to 5°N). Anomalies are computed relative to the 850-1200 CE mean. El Niño and La Niña events in e) are defined as departures exceeding  $\pm 1\sigma$  of Niño3.4 sea surface temperature anomalies; note the flipped axis for La Niña events.

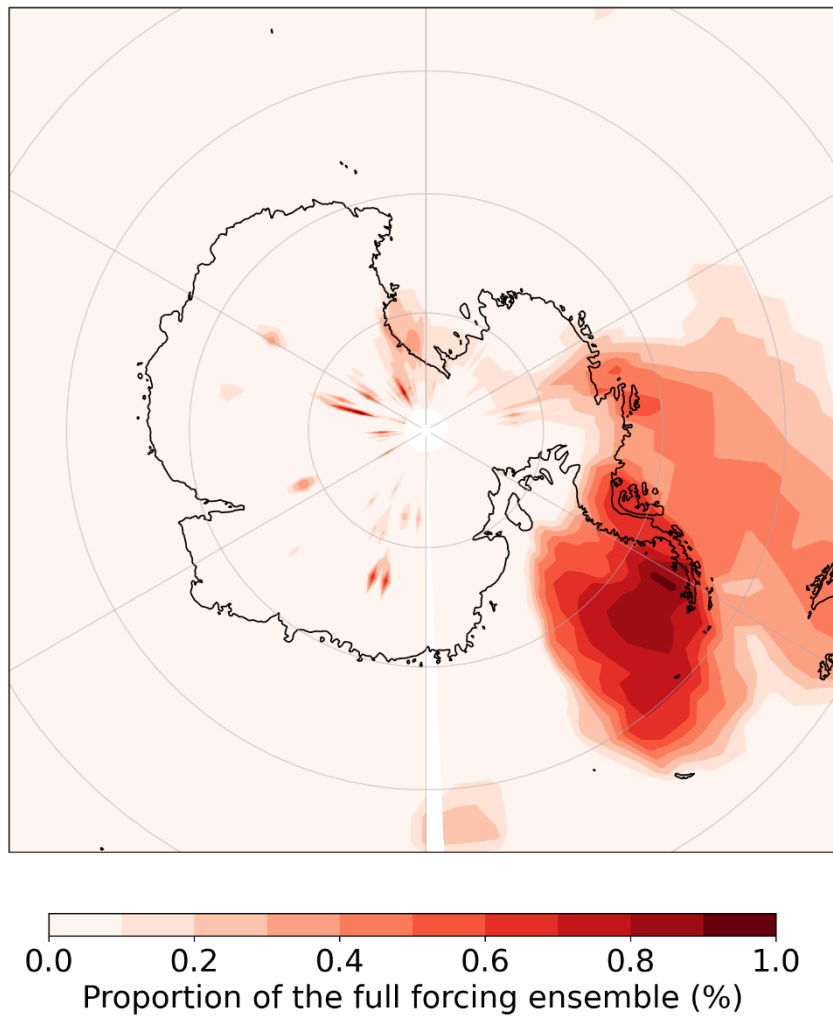

**Figure S6.** Regions of Antarctica with a LM warming trend (linear temperature trend  $>0^{\circ}\text{C/kyr}$  between 850 and 1850 CE) in the 13 full forcing ensemble simulations.

**Table S1.** List of sites in the Antarctic region and qualitative paleotemperature inference from Lünig et al. [13]. For further discussion of the paleoclimate records, the methodology used to determine a qualitative paleotemperature reconstruction, and full citations for each reconstruction see Lünig et al. [13].

| No | Locality                         | Region              | Latitude | Longitude | # of age constraints | Proxies                                                   | Reference                                                 | Inferred Last Millennium Temperature Trend |
|----|----------------------------------|---------------------|----------|-----------|----------------------|-----------------------------------------------------------|-----------------------------------------------------------|--------------------------------------------|
| 1  | Kerguelen Islands                | Antarctic Islands   | -49.44   | 69.19     | 9                    | Moraine dating                                            | Jomelli et al. (2017)                                     | Cooling                                    |
| 2  | Ile de la Possession             | Antarctic Islands   | -46.39   | 51.81     | 4                    | Diatoms                                                   | Ooms et al. (2011)                                        | Warming                                    |
| 3  | TN057-17                         | Antarctic Islands   | -50.00   | 6.00      | 1                    | Diatoms                                                   | Nielsen et al. (2004), Divine et al. (2010)               | Neutral                                    |
| 4  | PS1652-2                         | Antarctic Islands   | -53.66   | 5.10      | 2                    | Diatoms                                                   | Xiao et al. (2016)                                        | Neutral                                    |
| 5  | PS2102-2                         | Antarctic Islands   | -53.35   | -4.99     | 4                    | Diatoms                                                   | Xiao et al. (2016)                                        | Cooling                                    |
| 6  | Hamberg Lakes                    | Antarctic Islands   | -54.35   | -36.33    | 7                    | Ti as glacial activity proxy                              | Clapperton et al. (1989), van der Bilt et al. (2017)      | Cooling                                    |
| 7  | Fan Lake                         | Antarctic Islands   | -54.50   | -37.05    | 16                   | Palynology, GDGT                                          | Strother et al. (2015), Foster et al. (2016)              | Cooling                                    |
| 8  | Signy Island                     | Antarctic Islands   | -60.72   | -45.63    | 5                    | $\delta^{18}\text{O}$ of authigenic lake carbonate, mites | Noon et al. (2003), Hodgson and Convey (2005)             | Cooling                                    |
| 9  | A9-EB2, eastern Bransfield Basin | Antarctic Peninsula | -61.97   | -55.96    | 9                    | Magnetic susceptibility                                   | Khim et al. (2002)                                        | Cooling                                    |
| 10 | JPC24                            | Antarctic Peninsula | -62.28   | -57.63    | 5                    | TOC                                                       | Barnard et al. (2014)                                     | Cooling                                    |
| 11 | GEBRA-1                          | Antarctic Peninsula | -62.59   | -58.54    | 3                    | Diatoms                                                   | Bárcena et al. (1998)                                     | Cooling                                    |
| 12 | PS69/335                         | Antarctic Peninsula | -62.26   | -58.77    | 5                    | Elemental ratios, TOC, opal, grain size                   | Hass et al. (2010), Monien et al. (2011)                  | Neutral                                    |
| 13 | Collins Ice Cap                  | Antarctic Peninsula | -62.18   | -58.90    | 12                   | Dating mosses                                             | Hall (2007)                                               | Cooling                                    |
| 14 | Ardley Island                    | Antarctic Peninsula | -62.21   | -58.94    | ?                    | P <sub>2</sub> O <sub>5</sub>                             | Sun et al. (2000), Huang et al. (2011), Liu et al. (2005) | Cooling                                    |
| 15 | Yanou Lake                       | Antarctic Peninsula | -62.22   | -58.96    | 3                    | GDGT-MSAT                                                 | Roberts et al. (2017)                                     | Neutral*                                   |



|    |                             |                            |        |        |    |                                                                            |                                                                                   |          |
|----|-----------------------------|----------------------------|--------|--------|----|----------------------------------------------------------------------------|-----------------------------------------------------------------------------------|----------|
| 16 | Midge Lake                  | Antarctic Peninsula        | -62.63 | -61.09 | 2  | LOI                                                                        | Björck et al. (1991)                                                              | Neutral  |
| 17 | JPC2                        | Antarctic Peninsula        | -63.36 | -55.84 | 12 | TOC, Ikaite crystallization                                                | Lu et al. (2012)                                                                  | Neutral  |
| 18 | JPC38                       | Antarctic Peninsula        | -63.72 | -57.41 | 2  | Diatoms                                                                    | Barbara et al. (2016)                                                             | Cooling  |
| 19 | Hidden Lake                 | Antarctic Peninsula        | -63.40 | -57.00 | 3  | LOI                                                                        | Zale (1994)                                                                       | Cooling  |
| 20 | Herbert Sound               | Antarctic Peninsula        | -63.96 | -57.73 | 9  | Diatoms, petrography                                                       | Minzoni et al. (2015)                                                             | Warming  |
| 21 | JRI ice core                | Antarctic Peninsula        | -64.20 | -57.68 | 16 | $\delta D$                                                                 | Mulvaney et al. (2012), Abram et al. (2013)                                       | Warming  |
| 22 | Anvers Island               | Antarctic Peninsula        | -64.49 | -63.87 | 6  | Dating mosses and shells                                                   | Hall et al. (2010)                                                                | Cooling  |
| 23 | U.S. Palmer Station         | Antarctic Peninsula        | -64.78 | -64.04 | 24 | Dating mosses                                                              | Yu et al. (2016)                                                                  | Cooling  |
| 24 | Litchfield Island           | Antarctic Peninsula        | -64.77 | -64.09 | 8  | Peat accumulation rate                                                     | Stelling et al. (2018)                                                            | Neutral* |
| 25 | ODP 1098                    | Antarctic Peninsula        | -64.86 | -64.20 | 2  | Magnetic susceptibility, Tex <sub>86</sub> , benthic foraminifera isotopes | Domack and Mayewski (1999), Shevenell and Kennett (2002), Shevenell et al. (2011) | Cooling  |
| 26 | Bigo Bay                    | Antarctic Peninsula        | -65.61 | -64.76 | 5  | Total organic carbon, biogenic opal                                        | Kim et al. (2018)                                                                 | Cooling  |
| 27 | KC-55                       | Antarctic Peninsula        | -65.66 | -64.92 | 4  | Total organic carbon                                                       | Christ et al. (2015)                                                              | Cooling  |
| 28 | Müller Ice Shelf            | Antarctic Peninsula        | -67.20 | -66.88 | 2  | Sedimentology, geochemistry, foraminifera                                  | Domack et al. (1995)                                                              | Cooling  |
| 29 | Rothera Point               | Antarctic Peninsula        | -67.57 | -68.10 | 5  | Dating mosses                                                              | Guglielmin et al. (2016)                                                          | Cooling  |
| 30 | JPC43                       | Antarctic Peninsula        | -68.26 | -66.96 | 1  | Magnetic susceptibility                                                    | Allen et al. (2010)                                                               | Neutral  |
| 31 | Berkner Island Ice Core     | Ronne & Filchner Ice Shelf | -79.57 | -45.78 | -  | $\delta D$ , $\delta^{18}O$                                                | Mulvaney et al. (2002), Graf et al. (2006)                                        | Warming  |
| 32 | Dronning Maud Land Traverse | East Antarctica            | -75.36 | -4.22  | -  | $\delta^{18}O$                                                             | Graf et al. (2002)                                                                | Cooling  |

|    |                                             |                 |        |        |    |                                                             |                                                                                                                        |          |
|----|---------------------------------------------|-----------------|--------|--------|----|-------------------------------------------------------------|------------------------------------------------------------------------------------------------------------------------|----------|
| 33 | Schirmacher Oasis                           | East Antarctica | -70.76 | 11.59  | 3  | TOC, BSi, grain size, elemental geochemistry                | Govil et al. (2016)                                                                                                    | Warming  |
| 34 | Lützow Holm Bay                             | East Antarctica | -69.50 | 39.70  | 18 | Diatoms, sedimentology, geochemistry                        | Tavernier et al. (2014)                                                                                                | Neutral* |
| 35 | Dome Fuji Ice Core                          | East Antarctica | -77.32 | 39.70  | -  | $\delta^{18}\text{O}$                                       | Horiuchi et al. (2008)                                                                                                 | Cooling  |
| 36 | Plateau Remote Ice Core                     | East Antarctica | -84.00 | 43.00  | -  | $\delta^{18}\text{O}$                                       | Mosley-Thompson (1996)                                                                                                 | Cooling  |
| 37 | Lake Terrasovoje AM02 core                  | East Antarctica | -70.55 | 68.00  | 4  | Diatoms, geochemistry                                       | Wagner et al. (2004)                                                                                                   | Neutral* |
| 38 | Amery Ice Shelf                             | East Antarctica | -69.71 | 72.64  | 1  | Diatoms                                                     | Hemer and Harris (2003)                                                                                                | Cooling  |
| 39 | Kirisjes Pond                               | East Antarctica | -69.37 | 76.13  | 3  | Diatoms                                                     | Verleyen et al. (2004)                                                                                                 | Cooling  |
| 40 | Co1010                                      | East Antarctica | -68.80 | 77.95  | 2  | TOC                                                         | Berg et al. (2010)                                                                                                     | Neutral  |
| 41 | Zolotov Island                              | East Antarctica | -68.65 | 77.87  | 4  | $\text{P}_2\text{O}_5$                                      | Huang et al. (2011)                                                                                                    | Neutral* |
| 42 | Long Peninsula                              | East Antarctica | -68.50 | 78.10  | 6  | P/Al                                                        | Gao et al. (2019)                                                                                                      | Cooling  |
| 43 | Dome B Ice Core                             | East Antarctica | -77.90 | 94.92  | -  | $\delta\text{D}$                                            | Masson et al. (2000), Vimeux et al. (2001)                                                                             | Cooling  |
| 44 | Vostok Ice Core EPICA                       | East Antarctica | -78.47 | 106.80 | -  | $\delta\text{D}$                                            | Masson et al. (2000), Vimeux et al. (2001)                                                                             | Neutral  |
| 45 | Dome Concordia ("Dome C") Ice Core          | East Antarctica | -75.10 | 123.35 | -  | $\delta\text{D}$                                            | Masson et al. (2000), Masson-Delmotte et al. (2004)                                                                    | Cooling  |
| 46 | Dome Summit South (DSS) - Law Dome Ice Core | East Antarctica | -66.77 | 112.81 | -  | $\delta\text{D}$ , $\delta^{18}\text{O}$                    | Morgan and Ommen (1997), Dahl-Jensen et al. (1999), Roberts et al. (2001), Plummer et al. (2012), Goosse et al. (2004) | Neutral  |
| 47 | TALDICE Ice Core                            | East Antarctica | -72.82 | 159.18 | -  | $\delta^{18}\text{O}$ , $\delta\text{D}$ , deuterium excess | PAGES 2k Consortium (2017), Mezgec et al. (2017)                                                                       | Cooling  |
| 48 | WRS_CH                                      | Ross Sea        | -72.30 | 170.00 | 3  | Diatoms                                                     | Mezgec et al. (2017)                                                                                                   | Cooling  |
| 49 | WRS_WB                                      | Ross Sea        | -74.18 | 166.00 | 3  | Diatoms                                                     | Mezgec et al. (2017)                                                                                                   | Cooling  |

|    |                                 |                        |        |         |    |                                        |                                                                       |         |
|----|---------------------------------|------------------------|--------|---------|----|----------------------------------------|-----------------------------------------------------------------------|---------|
| 50 | Edmonson<br>Point Glacier       | Victoria<br>Land coast | -74.32 | 165.07  | 10 | Moraine dating                         | Baroni and Orombelli (1994b)                                          | Cooling |
| 51 | Prior Island                    | Victoria<br>Land coast | -75.68 | 162.87  | 6  | Penguin remains<br>ages                | Baroni and Orombelli (1994a)                                          | Cooling |
| 52 | Western<br>Ross Sea<br>Offshore | Victoria<br>Land coast | -76.00 | 162.00  | 51 | Dating elephant<br>seal skin           | Hall et al. (2006)                                                    | Cooling |
| 53 | core<br>KC208.09                | Ross Sea               | -77.00 | 162.85  | 3  | Diatoms                                | Leventer et al. (1993)                                                | Cooling |
| 54 | Lower Glacier Ice Core          | Victoria<br>Land coast | -77.33 | 162.53  | 4  | $\delta D$                             | Bertler et al. (2011)                                                 | Cooling |
| 55 | Wilson<br>Piedmont<br>Glacier   | Victoria<br>Land coast | -77.37 | 163.50  | 27 | Glacial topo-<br>graphy dating         | Hall and Denton (2002)                                                | Cooling |
| 56 | Taylor<br>Dome Ice<br>Core      | East Ant-<br>arctica   | -77.80 | 158.72  | -  | $\delta D, \delta^{18}O$               | Steig et al. (1998)                                                   | Cooling |
| 57 | RICE Ice<br>Core                | Eastern<br>Ross Sea    | -79.39 | -161.46 | -  | $\delta D$                             | Bertler et al. (2018)                                                 | Cooling |
| 58 | Siple Dome<br>Ice Core          | West Ant-<br>arctica   | -81.67 | -148.83 | -  | $\delta D, \delta^{18}O$               | Mayewski et al. (2013)                                                | Cooling |
| 59 | Dominion<br>Range Ice<br>Core   | East Ant-<br>arctica   | -79.47 | -112.09 | -  | $\delta D$                             | Masson et al. (2000)                                                  |         |
| 60 | WAIS Di-<br>vide Ice<br>Core    | West Ant-<br>arctica   | -75.36 | -4.22   | -  | $\delta^{18}O$ , air bubble<br>density | Steig et al. (2013), Fegyveresi et al.<br>(2016), Fudge et al. (2016) | Warming |

\*Record without reliable resolution or age control
